# Supplementary material
Source: PubMed Central journal article supplement (PMC2850017)
Supplement: pp.109.150979_1.pdf [file pp.109.150979_1.pdf]

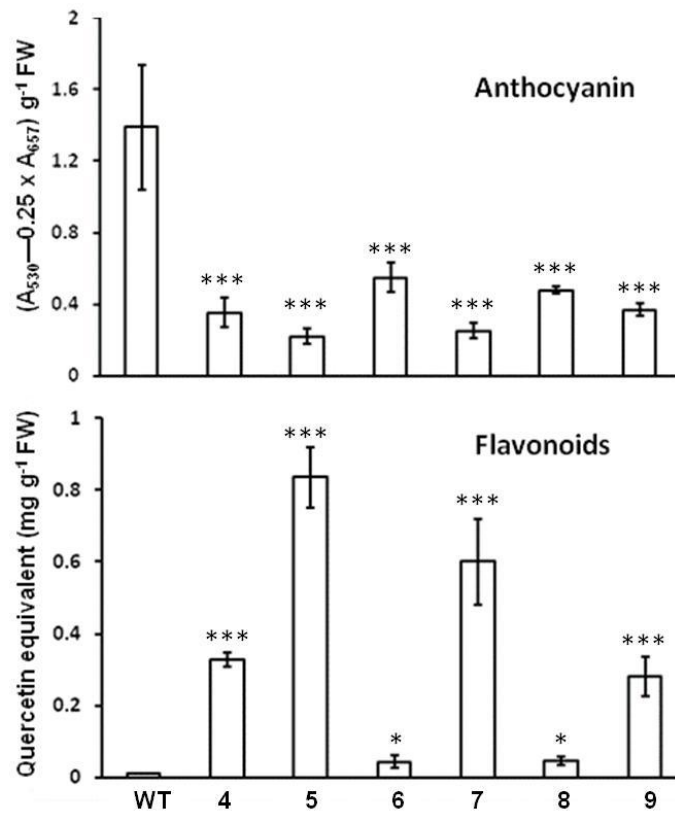

**Supplementary Figure S1.** Effect of *AtMYB12* expression on flower anthocyanin and leaf flavonoid content in transgenic tobacco lines (T4 to T9), as compared to control (WT).

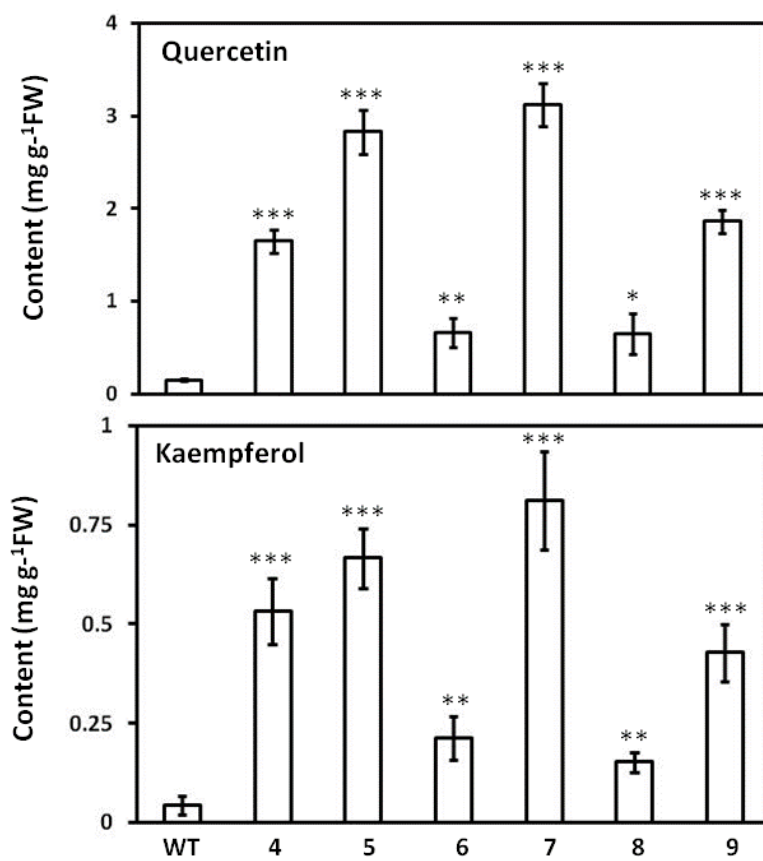

**Supplementary Figure S2.** Effect of *AtMYB12* expression on leaf quercetin and kaempferol content in transgenic tobacco lines as compared to the control (WT). Analysis of the compounds was carried out after extraction by acid hydrolysis and quantification by HPLC.

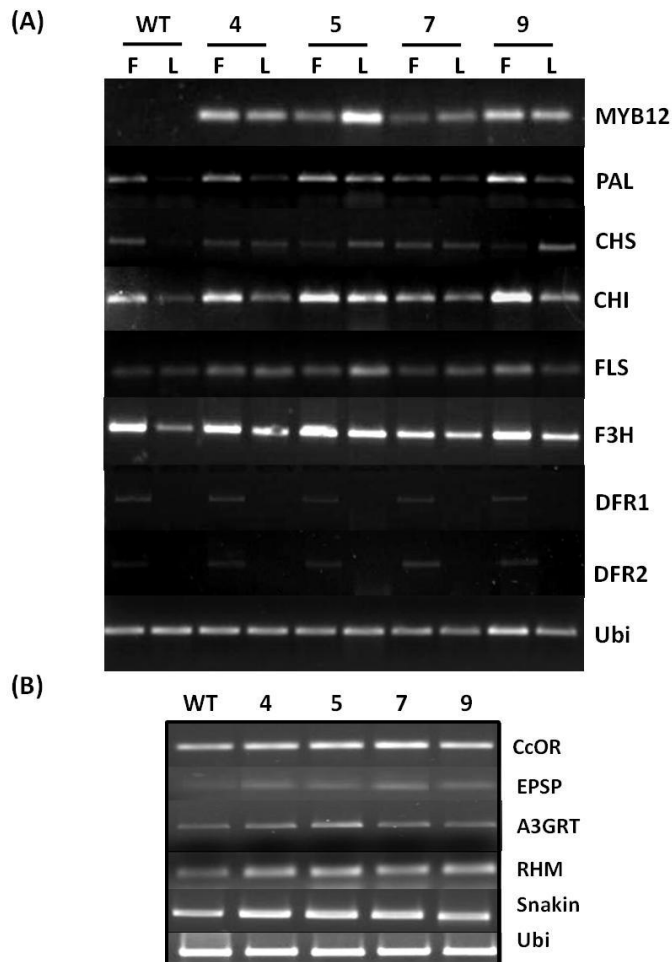

**Supplementary Figure S3.** Semi-quantitative RTPCR analysis of genes up-regulated in *AtMYB12* expressing tobacco transgenic lines. Analysis was carried out for different genes involved in phenylpropanoid (A) and other pathways (B). MYB12, *AtMYB12*; PAL, Phenylalanine ammonia lyase; CHS, Chalcone synthase; CHI, Chalcone isomerase; FLS, Flavonol synthase; F3H, Flavonone-3-hydroxylase; DFR1, Dihydroflavonol 4-reductase 1; DFR2, Dihydroflavonol 4-reductase; CcOR, Cinnamoyl CoA reductase; EPSP, 5-enoylpyruvylshikimate-3-phosphate synthase; A3RT, Anthocyanin 3-O-glucoside rhamnosyltransferase; RHM, Rhamnose synthase; Snakin and Ubi, ubiquitin.

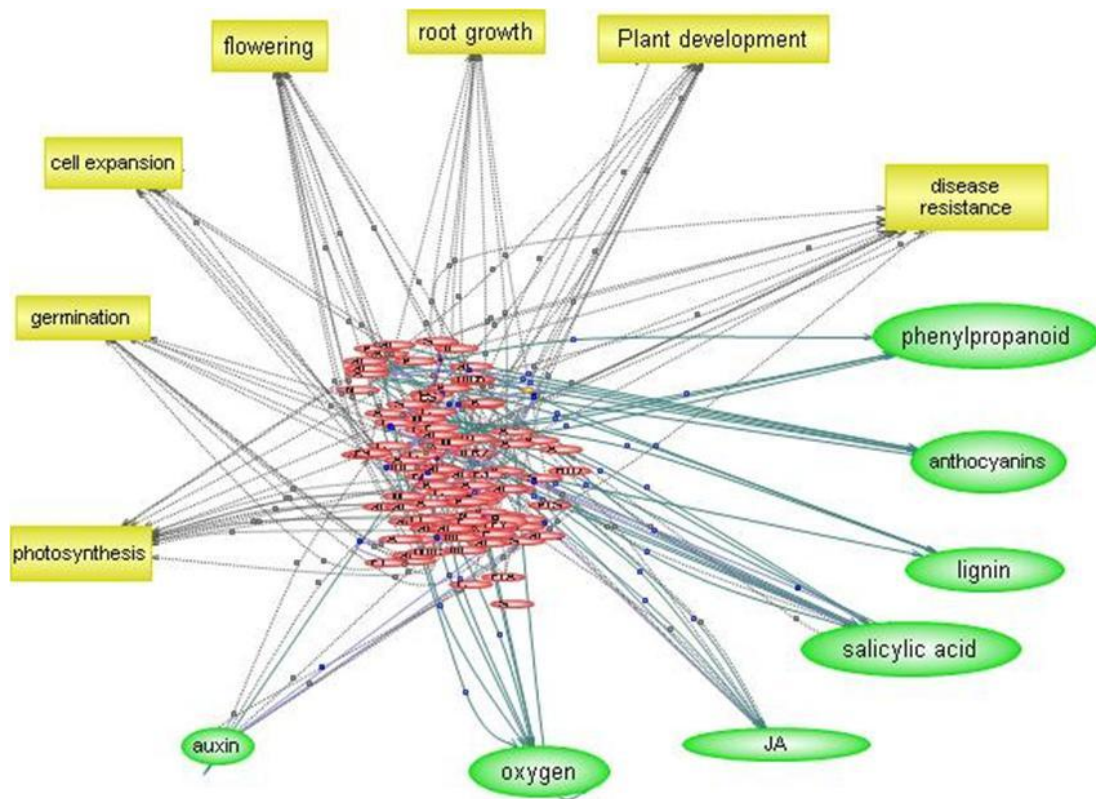

**Supplementary Figure S4.** Functional network predicted from the genes differentially regulated by *AtMYB12* in transgenic tobacco lines. *Arabidopsis* homologues of the differentially expressed genes in *AtMYB12* tobacco were identified to construct interactive network using Pathway Studio (Ariadne Genomics, USA).

**Supplementary Table S1.** List of up-regulated ( $\geq$  two-fold) genes in *AtMYB12*-expressing tobacco lines

| <b>Tobacco Accession No.</b> | <b>Putative annotation</b>                                                                            | <b>TAIR locus id</b> | <b>Annotation in TAIR</b>                                                                                       |
|------------------------------|-------------------------------------------------------------------------------------------------------|----------------------|-----------------------------------------------------------------------------------------------------------------|
| EB427243                     | Anthocyanin 3-O-glucoside: rhamnosyltransferase [ <i>Petunia hybrida</i> ]                            | AT3G29630            | Glycosyltransferase family protein; similar to glycosyltransferase family protein                               |
| EH622481                     | Basic beta-1,3-glucanase [ <i>Nicotiana tabacum</i> ]                                                 | AT4G16260            | Glycosyl hydrolase family 17 protein; similar to BG1 ( $\beta$ -1,3-Glucanase 1),                               |
| AY061820                     | <i>Nicotiana tabacum</i> asparagine synthetase (din6) mRNA                                            | AT5G65010            | Asparagine biosynthetic process                                                                                 |
| BP129992                     | LBD37 (Lob Domain-Containing Protein 37)                                                              | AT5G67420            | LBD37 (Lob domain containing protein)                                                                           |
| EB425624                     | Chalcone synthase ( <i>Solanum tuberosum</i> )                                                        | AT5G13930            | Chalcone synthase                                                                                               |
| AY578143                     | <i>Nicotiana tabacum</i> 3-dehydroquinate dehydratase / shikimate dehydrogenase isoform 2 mRNA        | AT3G06350            | 3-dehydroquinate dehydratase activity                                                                           |
| BP533763                     | Unnamed protein product [ <i>Vitis vinifera</i> ]                                                     | AT4G10270            | Wound-responsive protein, putative                                                                              |
| EB432591                     | Snakin-2 ( <i>Solanum tuberosum</i> )                                                                 | AT1G75750            | GASA5 (GAST1 protein homolog); similar to gibberellin-regulated family protein                                  |
| BP134431                     | Hypothetical protein Paramecium                                                                       | AT2G19806            | Transposable element gene; Mariner-like transposase family,                                                     |
| DW001929                     | Phenylalanine ammonialyase 1 [ <i>Petunia hybrida</i> ]                                               | AT2G37040            | Encodes a protein similar to phenylalanine ammonia-lyase                                                        |
| EB431024                     | Flavanone 3-hydroxylase [ <i>Nicotiana tabacum</i> ]                                                  | AT3G51240            | Encodes flavanone 3-hydroxylase                                                                                 |
| EB683796                     | PR protein; osmotin [ <i>Nicotiana tabacum</i> ]                                                      | AT4G11650            | Osmotin-like protein                                                                                            |
| EH615405                     | Chalcone isomerase [ <i>Nicotiana tabacum</i> ]                                                       | AT5G05270            | Chalcone-flavanone isomerase family protein                                                                     |
| EB682906                     | Tonoplast intrinsic protein bobTIP26-2 [ <i>Brassica oleracea</i> ]                                   | AT2G36830            | Gamma tonoplast intrinsic protein                                                                               |
| DV161807                     | RHM1 [ <i>Arabidopsis thaliana</i> ]                                                                  | AT1G78570            | RHM1 (Rhamnose biosynthesis 1); [ <i>Arabidopsis thaliana</i> ]                                                 |
| BP531184                     | Hypothetical protein BRAFLDRAFT_127937 [ <i>Branchiostoma floridae</i> ]                              | AT1G61610            | S-locus lectin protein kinase family protein                                                                    |
| BP526802                     | Hypothetical protein [ <i>Vitis vinifera</i> ]                                                        | AT1G42595            | Transposable element gene; Mutator-like transposase family                                                      |
| EB678275                     | L-serine dehydratase, iron-sulfur-dependent, beta subunit [Dethiosulfovibrio peptidovorans DSM 11002] | AT3G22150            | Pentatricopeptide (PPR) repeat-containing protein; similar to pentatricopeptide (PPR) repeat-containing protein |
| BP535514                     | Drm3-like protein [ <i>Solanum tuberosum</i> ]Auxin repressed                                         | AT1G56220            | Dormancy/auxin associated family protein; similar to dormancy/auxin associated protein-related                  |
| BP130879                     | EGL-Nine (EGLN) protein (ISS) [ <i>Ostreococcus tauri</i> ]                                           | AT5G25190            | Encodes a member of the ERF (ethylene response factor) subfamily B-6 of ERF/AP2 transcription factor family     |
| EB427420                     | Unnamed protein product [ <i>Vitis vinifera</i> ]                                                     | AT4G16563            | Aspartyl protease family protein; similar to aspartyl protease family protein                                   |
| EB439864                     | Unnamed protein product [ <i>Vitis vinifera</i> ]                                                     | AT1G06550            | Enoyl-CoA hydratase/isomerase family protein; similar to CHY1 ( $\beta$ -Hydroxyisobutryl-CoA Hydrolase 1)      |
| Y07563                       | <i>N.tabacum</i> mRNA for hin1 gene                                                                   | AT2G35460            | Harpin-induced family protein / HINI family protein / harpin-responsive family protein                          |
| BP533176                     | No significant similarity found                                                                       | AT3G09410            | Pectinacetylerase family protein; similar to pectinacetylerase family protein                                   |
| CV021144                     | Putative auxin-repressed protein [ <i>Prunus armeniaca</i> ]                                          | AT1G56220            | Dormancy/auxin associated family protein; similar to dormancy/auxin associated protein-related                  |
| EH620015                     | 3-phosphoshikimate 1-carboxyvinyltransferase 1/ 5-                                                    | AT2G45300            | Encodes 3-phosphoshikimate 1-carboxyvinyltransferase / 5-enolpyruvylshikimate-3-phosphate / EPSP synthase       |

|                 |                                                                     |                  |                                                                                                                     |
|-----------------|---------------------------------------------------------------------|------------------|---------------------------------------------------------------------------------------------------------------------|
|                 | enolpyruvylshikimate-3-phosphate synthase                           |                  | involved in chorismate biosynthesis                                                                                 |
| <b>EH624008</b> | Hypothetical protein [ <i>Paramecium tetraurelia</i> strain d4-2]   | <b>AT5G10280</b> | <i>AtMYB64</i> , <i>AtMYB92</i> , F18D22.50, F18D22_50                                                              |
| <b>EB431117</b> | No significant similarity found                                     | <b>AT5G03820</b> | GDSL-motif lipase/hydrolase family protein; similar to carboxylesterase                                             |
| <b>EB443716</b> | Thionin like protein [ <i>Nicotiana tabacum</i> ]                   | <b>AT2G02130</b> | Predicted to encode a PR (pathogenesis-related) protein. Belongs to the plant defensin                              |
| <b>CN949753</b> | Predicted protein [ <i>Populus trichocarpa</i> ]                    | <b>AT1G49560</b> | MYB family transcription factor,                                                                                    |
| <b>EB442268</b> | Hypothetical protein [ <i>Vitis vinifera</i> ]                      | <b>AT1G48300</b> | Unknown protein                                                                                                     |
| <b>EB450056</b> | Unnamed protein product [ <i>Vitis vinifera</i> ]                   | <b>AT2G46220</b> | unknown protein                                                                                                     |
| <b>EB446913</b> | Transaldolase [ <i>Solanum tuberosum</i> ]                          | <b>AT5G13420</b> | Transaldolase                                                                                                       |
| <b>EH615763</b> | Cystatin-like protein [ <i>Citrus paradisi</i> ]                    | <b>AT5G47550</b> | Cysteine protease inhibitor, putative / cystatin, putative; Identical to cysteine proteinase inhibitor 5            |
| <b>CV016634</b> | Predicted protein [ <i>Populus trichocarpa</i> ]                    | <b>AT3G50770</b> | Calmodulin-related protein, putative; Identical to Calmodulin-like protein 41 (CML41)                               |
| <b>AB236952</b> | Nicotiana tabacum C4H mRNA for trans-cinnamate 4-monooxygenase      | <b>AT2G30490</b> | Cinnamate-4-hydroxylase                                                                                             |
| <b>EB679296</b> | Carboxylesterase [ <i>Arabidopsis thaliana</i> ]                    | <b>AT5G45920</b> | Carboxylesterase; similar to GDSL-motif lipase/hydrolase family protein                                             |
| <b>DW003994</b> | Cinnamoyl CoA reductase [ <i>Solanum tuberosum</i> ]                | <b>AT1G80820</b> | Cinnamoyl coA reductase                                                                                             |
| <b>DW001734</b> | Hypothetical protein [ <i>Vitis vinifera</i> ]                      | <b>AT1G48300</b> | Unknown protein                                                                                                     |
| <b>EB449778</b> | Beta xylosidase [ <i>Camellia sinensis</i> ]                        | <b>AT5G49360</b> | Beta xylosidase 1                                                                                                   |
| <b>EH617140</b> | Arginine decarboxylase [ <i>Nicotiana tabacum</i> ]                 | <b>AT4G34710</b> | encodes a arginine decarboxylase (ADC)                                                                              |
| <b>EB428594</b> | Unnamed protein product [ <i>Vitis vinifera</i> ]                   | <b>AT2G22250</b> | Aspartate amino transferase                                                                                         |
| <b>DV159582</b> | Endo-xyloglucan transferase (EXGT) [ <i>Nicotiana tabacum</i> ]     | <b>AT5G13870</b> | Endoxyloglucan transferase                                                                                          |
| <b>EB449474</b> | Hypothetical protein [ <i>Vitis vinifera</i> ]                      | <b>AT2G17650</b> | AMP-dependent synthetase and ligase family protein;                                                                 |
| <b>EB426371</b> | DNAJ-like protein [ <i>Solanum lycopersicum</i> ]                   | <b>AT2G17880</b> | DNAJ heat shock protein                                                                                             |
| <b>CN824871</b> | SRC2-like protein [ <i>Nicotiana benthamiana</i> ]                  | <b>AT1G09070</b> | SRC2                                                                                                                |
| <b>EB679929</b> | CYP84A14v1 [ <i>Nicotiana tabacum</i> ]                             | <b>AT4G36220</b> | Encodes ferulate 5-hydroxylase (F5H). Involved in lignin biosynthesis                                               |
| <b>EB677824</b> | Unnamed protein product [ <i>Vitis vinifera</i> ]                   | <b>AT5G08060</b> | Unnamed protein product                                                                                             |
| <b>BP128507</b> | Conserved hypothetical protein [Bacteroides sp. D1]                 | <b>AT1G05500</b> | Synaptotagmin homolog                                                                                               |
| <b>EH621485</b> | Unnamed protein product [ <i>Vitis vinifera</i> ]                   | <b>AT3G04140</b> | Ankyrin repeat family protein; similar to ankyrin repeat family protein                                             |
| <b>EB437250</b> | Ntdin [ <i>Nicotiana tabacum</i> ]                                  | <b>AT5G66040</b> | Sulfur transferase protein                                                                                          |
| <b>EB427781</b> | Type 2 proly 4-hydroxylase [ <i>Nicotiana tabacum</i> ]             | <b>AT3G28480</b> | Oxidoreductase, 2OG-Fe(II) oxygenase family protein; similar to oxidoreductase, 2OG-Fe(II) oxygenase family protein |
| <b>EH621860</b> | Avr9/Cf-9 rapidly elicited protein 169 [ <i>Nicotiana tabacum</i> ] | <b>AT1G78410</b> | VQ motif-containing protein; similar to unknown protein                                                             |
| <b>EB441340</b> | Hydrogen-exporting ATPase,                                          | <b>AT3G60330</b> | Hydrogen-exporting ATPase                                                                                           |

|                 |                                                             |                  |                                                                   |
|-----------------|-------------------------------------------------------------|------------------|-------------------------------------------------------------------|
| <b>EH620838</b> | regulator of gene silencing<br>[ <i>Nicotiana tabacum</i> ] | <b>AT1G76650</b> | CML38; calcium ion binding; similar to calmodulin-related protein |
| <b>EH621541</b> | predicted protein [ <i>Populus trichocarpa</i> ]            | <b>AT4G37300</b> | Maternal effect embryo arrest                                     |
| <b>BP527797</b> | Glutamate synthase, putative<br>[ <i>Ricinus communis</i> ] | <b>AT5G53460</b> | NADH-dependent glutamate synthase                                 |

*Nucleotide sequences of all the probe ids were downloaded and homology search was carried out using BLASTx on the NCBI and TAIR databases.*

**Supplementary Table S2.** List of down-regulated ( $\geq$  two-fold) genes in *AtMYB12*-expressing tobacco lines

| <b>Tobacco Accession No.</b> | <b>Putative annotation</b>                                                               | <b>TAIR locus id</b> | <b>Annotation in TAIR</b>                                                                     |
|------------------------------|------------------------------------------------------------------------------------------|----------------------|-----------------------------------------------------------------------------------------------|
| EB450456                     | Unnamed protein product [ <i>Vitis vinifera</i> ]                                        | AT1G09750            | Aspartyl protease family protein                                                              |
| EB426001                     | Pectin methylesterase [ <i>Nicotiana tabacum</i> ]                                       | AT3G05610            | Pectinesterase family protein                                                                 |
| EG649865                     | Unnamed protein product [ <i>Vitis vinifera</i> ]                                        | AT3G33011            | Transposable element gene                                                                     |
| EH618693                     | Unnamed protein product [ <i>Vitis vinifera</i> ]                                        | AT3G13610            | Oxidoreductase, 2OG-Fe(II) oxygenase family protein                                           |
| EB424996<br>xcxzcxczc        | Putative caffeoyl-CoA 3-O-methyltransferase [ <i>Nicotiana tabacum</i> ]                 | AT4G34050            | Caffeoyl-CoA 3-O-methyltransferase                                                            |
| BP533582                     | Aspartic proteinase nepenthesin-1 precursor, putative [ <i>Ricinus communis</i> ]        | AT1G09750            | Aspartic-type endopeptidase activity.                                                         |
| EB425297                     | Hypothetical protein PICST_51421                                                         | AT5G57050            | ABA insensistive2 Encodes a protein phosphatase 2C and is involved in ABA signal transduction |
| DW000332                     | Betaine-aldehyde dehydrogenase, chloroplast                                              | AT3G48170            | Arabidopsis thaliana putative betaine aldehyde dehydrogenase                                  |
| EH624390                     | Vetispiradiene synthase [ <i>Solanum tuberosum</i> ]                                     | AT3G32030            | Terpene synthase/cyclase family protein                                                       |
| BP533451                     | Arginine decarboxylase [ <i>Cucumis sativus</i> ]                                        | AT4G15360            | Cytochrome P450;Molecular Function: monooxygenase                                             |
| DV159225                     | Heat-shock protein, putative [ <i>Ricinus communis</i> ]                                 | AT5G12020            | Heat shock protein                                                                            |
| EB425990                     | Unnamed protein product [ <i>Vitis vinifera</i> ]                                        | AT5G62350            | Invertase/pectin methylesterase inhibitor family protein                                      |
| EH617289                     | Probable glutathione S-transferase parA [ <i>Nicotiana tabacum</i> ]                     | AT1G78340            | Encodes glutathione transferase belonging to the tau class of GSTs                            |
| EH665203                     | GEM-like 1 [ <i>Vitis vinifera</i> ]                                                     | AT1G28200            | FH interacting protein                                                                        |
| EB427383                     | Pectate lyase [ <i>Nicotiana tabacum</i> ]                                               | AT5G15110            | Pectate lyase family protein                                                                  |
| EH619192                     | Predicted protein [ <i>Populus trichocarpa</i> ]                                         | AT4G22990            | SPX (SYG1/Pho81/XPR1) domain-containing protein                                               |
| EB450187                     | Hypothetical protein [ <i>Vitis vinifera</i> ]                                           | AT5G34965            | Transposable element gene; copia-like retrotransposon family                                  |
| EH618280                     | mRNA inducible by salicylic acid or by TMV during Systemic Acquired, Resistance response | AT5G04480            | Molecular function unknown                                                                    |
| EH616792                     | Predicted protein [ <i>Populus trichocarpa</i> ]                                         | AT4G13010            | Oxidoreductase/ zinc ion binding                                                              |
| EB678731                     | Hypothetical protein [ <i>Vitis vinifera</i> ]                                           | AT1G71691            | GDSL-motif lipase/hydrolase family protein                                                    |
| EB451837                     | Unnamed protein product [ <i>Vitis vinifera</i> ]                                        | AT1G15410            | Aspartate-glutamate racemase                                                                  |
| BP526215                     | Ethylene receptor [ <i>Petunia hybrida</i> ]                                             | AT3G23150            | Ethylene response 2                                                                           |
| DV159074                     | mRNA inducible by salicylic acid or by TMV during Systemic Acquired, Resistance response | AT3G54230            | nucleic acid binding / nucleotide binding / zinc ion binding                                  |
| DV999116                     | CYP82E4v6 [ <i>Nicotiana tabacum</i> ]                                                   | AT2G25160            | CYP82F1                                                                                       |



|                 |                                                                                                  |                  |                                                                                                                         |
|-----------------|--------------------------------------------------------------------------------------------------|------------------|-------------------------------------------------------------------------------------------------------------------------|
| <b>EB425362</b> | Pollen tube RhoGDI2<br>[ <i>Nicotiana tabacum</i> ]                                              | <b>AT3G07880</b> | Rho GDP-dissociation inhibitor family protein; Identical to Rho GDP-dissociation inhibitor 1 (GDI1)                     |
| <b>EB446807</b> | Conserved hypothetical protein<br>[ <i>Ricinus communis</i> ]                                    | <b>AT2G02710</b> | PAS/LOV Protein                                                                                                         |
| <b>DV158594</b> | ECP31 protein [ <i>Daucus carota</i> ]                                                           | <b>AT3G22490</b> | Late embryogenesis abundant protein, putative / LEA protein, putative; similar to ATECP31 (late embryogenesis abundant) |
| <b>DW003046</b> | Asparaginase 2 [ <i>Medicago truncatula</i> ]                                                    | <b>AT3G16150</b> | L-asparaginase, putative / L-asparagine amidohydrolase, putative; Identical to Probable L-asparaginase 2 precursor      |
| <b>EB435318</b> | Cytochrome P450<br>monooxygenase [ <i>Nicotiana sylvestris</i> ]                                 | <b>AT4G31940</b> | CYP82C4                                                                                                                 |
| <b>DW003245</b> | Histone H3.1t [ <i>Culex quinquefasciatus</i> ]                                                  | <b>AT4G40040</b> | Histone H3.2                                                                                                            |
| <b>EG649865</b> | Unnamed protein product [ <i>Vitis vinifera</i> ]                                                | <b>AT3G33011</b> | Transposable element gene; copia-like retrotransposon family                                                            |
| <b>EH619790</b> | Sesquiterpene synthase<br>[ <i>Fabiana imbricate</i> ]                                           | <b>AT1G64530</b> | RWP-RK domain-containing protein; similar to RWP-RK domain-containing protein                                           |
| <b>EB450523</b> | Auxin:hydrogen symporter,<br>putative [ <i>Ricinus communis</i> ]                                | <b>AT1G20925</b> | Auxin efflux carrier family protein; similar to auxin efflux carrier family protein [ <i>Arabidopsis thaliana</i> ]     |
| <b>CV016966</b> | DC1.2 homologue [ <i>Nicotiana tabacum</i> ]<br>Pectin inverterse/Pectin methylestrase inhibitor | <b>AT5G62350</b> | Invertase/pectin methylesterase inhibitor family                                                                        |
| <b>EB450593</b> | 21 kDa protein precursor,<br>putative [ <i>Ricinus communis</i> ]                                | <b>AT2G01610</b> | Invertase/pectin methylesterase inhibitor family protein                                                                |
| <b>EB679611</b> | Predicted protein [ <i>Populus trichocarpa</i> ]                                                 | <b>AT2G05920</b> | Subtilase family protein;                                                                                               |
| <b>EB450636</b> | Predicted protein [ <i>Populus trichocarpa</i> ]                                                 | <b>AT2G41380</b> | Embryo-abundant protein-related; similar to embryo-abundant protein-related, methyltransferase activity                 |
| <b>BP132920</b> | N-like protein [ <i>Nicotiana tabacum</i> ]                                                      | <b>AT5G38350</b> | Disease resistance protein                                                                                              |
| <b>CV019874</b> | Hypothetical protein [ <i>Vitis vinifera</i> ]                                                   | <b>AT2G28740</b> | Histone 4                                                                                                               |
| <b>EH623629</b> | SAR8.2n [ <i>Nicotiana tabacum</i> ]                                                             | <b>AT3G15350</b> | Glycosyltransferase family                                                                                              |
| <b>BP526993</b> | Unknown [ <i>Solanum tuberosum</i> ]                                                             | <b>AT2G34480</b> | 60S ribosomal protein L18A (RPL18aB); Identical to 60S ribosomal protein                                                |
| <b>EH619953</b> | mRNA inducible by salicylic acid                                                                 | <b>AT2G27530</b> | Encodes ribosomal protein L10aP. Identified in a screen for enhancers of as1.                                           |
| <b>EB428211</b> | GLN1;5; glutamate-ammonia ligase                                                                 | <b>AT5G37600</b> | encodes a cytosolic glutamine synthetase                                                                                |
| <b>EB442438</b> | Pyruvate decarboxylase                                                                           | <b>AT5G54960</b> | Pyruvate decarboxylase-2                                                                                                |
| <b>EH666250</b> | Conserved hypothetical protein<br>[ <i>Ricinus communis</i> ]                                    | <b>AT5G46700</b> | Encodes a transmembrane protein of the tetraspanin (TET) family                                                         |
| <b>BP533219</b> | Unnamed protein product [ <i>Vitis vinifera</i> ]                                                | <b>AT2G42580</b> | Tetratricopeptide repeat thioredoxin like                                                                               |
| <b>EB443392</b> | D-type cyclin family 3 subgroup 3<br>[ <i>Solanum tuberosum</i> ]                                | <b>AT4G34160</b> | D-type cyclin family 3 subgroup 3 [ <i>Solanum tuberosum</i> ]                                                          |
| <b>CN949738</b> | Patatin homolog [ <i>Nicotiana tabacum</i> ]                                                     | <b>AT2G26560</b> | Phospholipase A                                                                                                         |
| <b>EH619929</b> | mRNA inducible by salicylic acid                                                                 | <b>AT4G01975</b> | Transposable element gene; pseudogene,                                                                                  |
| <b>EB428944</b> | unnamed protein product [ <i>Vitis vinifera</i> ]                                                | <b>AT5G15180</b> | Peroxidase                                                                                                              |
| <b>EB447918</b> | Chromomethylase [ <i>Nicotiana sylvestris</i> ]                                                  | <b>AT1G69770</b> | Encodes a chromomethylase involved in methylating cytosine residues at non-CG sites                                     |
| <b>DV999922</b> | Water channel protein<br>[ <i>Nicotiana excelsior</i> ]                                          | <b>AT1G01620</b> | A member of the plasma membrane intrinsic protein subfamily PIP1                                                        |

|                 |                                                                         |                  |                                                                                                                |
|-----------------|-------------------------------------------------------------------------|------------------|----------------------------------------------------------------------------------------------------------------|
| <b>EH623154</b> | Lignan glucosyltransferase [ <i>Sesamum indicum</i> ]                   | <b>AT4G15260</b> | UDP-glucuronosyl/UDP-glucosyl transferase family protein; similar to UDP-glucuronosyl/UDP-glucosyl transferase |
| <b>DW004106</b> | Hypothetical protein [ <i>Vitis vinifera</i> ]                          | <b>AT4G10310</b> | Encodes a sodium transporter (HKT1)                                                                            |
| <b>EB451159</b> | Putative PLA2 [ <i>Nicotiana tabacum</i> ]                              | <b>AT1G77100</b> | peroxidase, putative; Identical to Peroxidase 13 precursor (PER13)                                             |
| <b>EB447957</b> | Geranylgeranyl pyrophosphate synthase 1 [ <i>Solanum lycopersicum</i> ] | <b>AT4G36810</b> | Geranyl geranyl pyrophosphate synthase1                                                                        |
| <b>BP530174</b> | Putative transposase [ <i>Ipomoea tricolor</i> ]                        | <b>AT5G34960</b> | Transposable element gene; similar to unknown protein                                                          |
| <b>BP528584</b> | Os10g0170600 [ <i>Oryza sativa</i> (japonica cultivar-group)]           | <b>AT1G37038</b> | Transposable element gene; hAT-like transposase family                                                         |
| <b>EB426609</b> | Expansin [ <i>Lycopersicon esculentum</i> ]                             | <b>AT2G03090</b> | Expansin A 15                                                                                                  |
| <b>EB679635</b> | Conserved hypothetical protein [ <i>Ricinus communis</i> ]              | <b>AT5G11420</b> | Similar to unknown protein [ <i>Arabidopsis thaliana</i> ]                                                     |
| <b>EB450241</b> | Arylacetamide deacetylase, putative [ <i>Ricinus communis</i> ]         | <b>AT3G48700</b> | Carboxyesterase                                                                                                |
| <b>EB450706</b> | Unnamed protein product [ <i>Vitis vinifera</i> ]                       | <b>AT5G67210</b> | Nucleic acid binding / pancreatic ribonuclease; similar to nucleic acid binding                                |
| <b>EH618171</b> | Predicted protein [ <i>Populus trichocarpa</i> ]                        | <b>AT1G52760</b> | Esterase/lipase/thioesterase family protein                                                                    |
| <b>BP535208</b> | Unnamed protein product [ <i>Vitis vinifera</i> ]                       | <b>AT3G54240</b> | Hydrolase, alpha/beta fold family protein                                                                      |
| <b>DW001052</b> | Unknown protein                                                         | <b>AT4G00360</b> | Encodes a member of the CYP86A subfamily of cytochrome p450 genes                                              |
| <b>BP135122</b> | Hypothetical protein [ <i>Vitis vinifera</i> ]                          | <b>AT5G39245</b> | Transposable element gene; non-LTR retrotransposon family (LINE)                                               |
| <b>EB424922</b> | predicted protein [ <i>Populus trichocarpa</i> ]                        | <b>AT5G66440</b> | Unknown protein                                                                                                |
| <b>BP136490</b> | No significant similarity                                               | <b>AT4G06196</b> | Transposable element gene; CACTA-like transposase family (Tnp2/En/Spm)                                         |
| <b>EH665347</b> | Expansin 6 [ <i>Arabidopsis thaliana</i> ]                              | <b>AT2G28950</b> | Expansin 6                                                                                                     |
| <b>EB428009</b> | No significant similarity                                               | <b>AT2G42570</b> | Similar to unknown protein                                                                                     |
| <b>BP533987</b> | Similar to histone protein Hist2h3c1 [ <i>Monodelphis domestica</i> ]   | <b>AT3G27360</b> | Histone H3; Identical to Histone H3.2 (HTR1)                                                                   |
| <b>EB680266</b> | Unnamed protein product [ <i>Vitis vinifera</i> ]                       | <b>AT5G65380</b> | Ripening-responsive protein, putative; similar to antiporter                                                   |
| <b>DV999970</b> | Conserved hypothetical protein [ <i>Ricinus communis</i> ]              | <b>AT4G27310</b> | Zinc finger (B-box type) family protein; similar to zinc finger (B-box type) family protein                    |
| <b>BP535208</b> | Unnamed protein product [ <i>Vitis vinifera</i> ]                       | <b>AT3G54240</b> | Hydrolase, alpha/beta fold family protein; similar to hydrolase                                                |
| <b>EH620388</b> | WRKY protein [ <i>Solanum tuberosum</i> ]                               | <b>AT1G62300</b> | WRKY6                                                                                                          |

|                 |                                                                      |                  |                                                                                                   |
|-----------------|----------------------------------------------------------------------|------------------|---------------------------------------------------------------------------------------------------|
| <b>EB447986</b> | Peroxidase [Solanum lycopersicum]                                    | <b>AT1G05260</b> | Encodes a cold-inducible cationic peroxidase that is involved in the stress response              |
| <b>EB683839</b> | Unknown Protein (Picea sitchensis)                                   | <b>AT5G59970</b> | Histone H4; Identical to Histone H4                                                               |
| <b>EH618110</b> | Cytochrome P450-dependent fatty acid hydroxylase [Nicotiana tabacum] | <b>AT3G56630</b> | CYP94D2                                                                                           |
| <b>EB425727</b> | Hypothetical protein [Vitis vinifera]                                | <b>AT2G33750</b> | Member of a family of proteins related to PUP1, a purine transporter                              |
| <b>DQ448851</b> | CK25 [Nicotiana tabacum]                                             | <b>AT4G28180</b> | Unknown protein                                                                                   |
| <b>BP533219</b> | Unnamed protein product [Vitis vinifera]                             | <b>AT2G42580</b> | Encodes a member of the TTL family and contains a thioredoxin like domain and three tandem TPRs   |
| <b>EB679200</b> | Unnamed protein product [Vitis vinifera]                             | <b>AT2G44300</b> | Lipid transfer protein-related; similar to protease inhibitor/seed storage/lipid transfer protein |
| <b>EB643474</b> | Unnamed protein product [Vitis vinifera]                             | <b>AT5G18840</b> | Sugar transporter, putative; Identical to Sugar transporter ERD6-like 16                          |
| <b>EH624401</b> | Catechol O-methyltransferase [Nicotiana tabacum]                     | <b>AT5G54160</b> | Caffeic acid/5-hydroxyferulic acid O-methyltransferase                                            |
| <b>BQ843156</b> | Hypothetical protein [Vitis vinifera]                                | <b>AT3G59840</b> | Similar to conserved hypothetical protein [Medicago truncatula]                                   |
| <b>EB425616</b> | Predicted protein [Populus trichocarpa]                              | <b>AT1G13440</b> | Glyceraldehyde-3-phosphate dehydrogenase                                                          |
| <b>EB445882</b> | DWARF1/DIMINUTO [Lycopersicon esculentum]                            | <b>AT3G19820</b> | Diminuto1, Dwarf1, Dwf1, Enhanced Very-Low-Fluence Responses1, Eve1, Mpn9.6                       |
| <b>BP137261</b> | Hypothetical protein RCOM_0939100 [Ricinus communis]                 | <b>AT3G18990</b> | Reduced vernalization response 1                                                                  |
| <b>DW001350</b> | Predicted protein [Populus trichocarpa]                              | <b>AT4G22070</b> | WRKY31                                                                                            |
| <b>AJ718251</b> | Predicted protein [Populus trichocarpa]                              | <b>AT3G46940</b> | Deoxyuridine 5'-triphosphate nucleotidohydrolase family                                           |
| <b>EB428187</b> | Conserved hypothetical protein [Ricinus communis]                    | <b>AT1G15385</b> | Unknown protein                                                                                   |
| <b>DQ460184</b> | Glucose-6-phosphate/phosphate-translocator [Arabidopsis thaliana]    | <b>AT1G61800</b> | Glucose-6-phosphate transmembrane transporter                                                     |

*Nucleotide sequences of all the probe ids were downloaded and homology search was carried out using BLASTx on the NCBI and TAIR databases.*

**Supplementary Table S3.** Insect bioassay on detached leaves of WT and *AtMYB12*-expressing transgenic tobacco plants

| <b>Line No</b> | <b>Mortality<br/>(%) after 3 days</b> | <b>Larval weight<br/>(mg±S.E)</b> | <b>Growth Reduction<br/>(%)</b> |
|----------------|---------------------------------------|-----------------------------------|---------------------------------|
| <b>Control</b> | 10.00                                 | 10.6±0.43                         | --                              |
| <b>T4</b>      | 76                                    | 8.84±0.59                         | 16.60                           |
| <b>T5</b>      | 80                                    | 4.75±0.78                         | 55.20                           |
| <b>T6</b>      | 75                                    | 6.24±0.57                         | 41.13                           |
| <b>T7</b>      | 80                                    | 4.58±0.78                         | 56.79                           |

Two day old larvae of *S. litura* were released on detached leaves. Observations on mortality and weight of surviving larvae were made after three days of feeding.

**Supplementary Table S4.** Insect bioassay on wild type and *AtMYB12* expressing transgenic tobacco lines

|                             | <b>WT</b>  | <b>T5</b> | <b>T7</b> |
|-----------------------------|------------|-----------|-----------|
| <b>Mortality (%)</b>        | 0          | 75        | 75        |
| <b>Average weight</b>       | 90.22±3.16 | 5.77±2.40 | 18.95±4.3 |
| <b>Growth reduction (%)</b> | 0          | 93.6      | 79.6      |

Twenty five neonate larvae of *S. litura* were released per plant. Weight and survival of the larvae were measured after 10 days. Weight of surviving larvae was used to calculate percent growth reduction.

**Supplementary Table S5.** Larval growth reduction caused by feeding *Spodoptera litura* on diet supplemented with *AtMYB12*-expressing tobacco leaf extract

| Treatment                     | Average larval weight (mg ± S.E) |                        |                         |                           |
|-------------------------------|----------------------------------|------------------------|-------------------------|---------------------------|
|                               | 3 <sup>rd</sup> day              | 5 <sup>th</sup> day    | 7 <sup>th</sup> day     | 10 <sup>th</sup> day      |
| Normal diet                   | 1.06±0.07 <sup>a</sup>           | 3.65±0.28 <sup>a</sup> | 14.25±0.86 <sup>a</sup> | 72.69 ± 3.12 <sup>a</sup> |
| Solvent                       | 1.11±0.07 <sup>a</sup>           | 3.89±0.26 <sup>a</sup> | 15.35±0.48 <sup>a</sup> | 73.13 ± 2.43 <sup>a</sup> |
| Control extract (0.5mg/ml)    | 1.06±0.04 <sup>a</sup>           | 3.63±0.19 <sup>a</sup> | 13.82±0.92 <sup>a</sup> | 73.09 ± 2.29 <sup>a</sup> |
| Control extract (1mg/ml)      | 0.99±0.04 <sup>a</sup>           | 3.61±0.19 <sup>a</sup> | 14.24±1.35 <sup>a</sup> | 68.79 ± 1.07 <sup>a</sup> |
| Transgenic extract (0.5mg/ml) | 0.83±0.06 <sup>b</sup>           | 2.30±0.26 <sup>b</sup> | 5.08±0.21 <sup>b</sup>  | 8.66± 0.66 <sup>b</sup>   |
| Transgenic extract (1mg/ml)   | 0.69±0.04 <sup>b</sup>           | 1.09±0.07 <sup>c</sup> | 1.78±0.13 <sup>c</sup>  | 3.31 ± 0.16 <sup>c</sup>  |
| Rutin (1mg/ml)                | 0.36±0.04 <sup>c</sup>           | 1.18±0.08 <sup>c</sup> | 1.90±0.11 <sup>c</sup>  | 3.40 ± 0.19 <sup>c</sup>  |
| Rutin (2mg/ml)                | 0.25±0.03 <sup>c</sup>           | 0.44±0.03 <sup>d</sup> | 0.63±0.04 <sup>c</sup>  | 1.92 ± 0.07 <sup>c</sup>  |

Stock solutions of different extracts were mixed separately with 50 ml of semi synthetic diet before solidifying. Control consisted of 5 ml ethanol mixed with the diet. The medium was poured into the petriplates (60 mm) and kept open overnight to evaporate the solvent. Each treatment was replicated thrice. One-day-old larvae of *Spodoptera litura* were used. Weight of surviving larvae was recorded on different days. Means were compared using DMRT at  $\alpha = 0.05$ . Means within a column, superscribed with same alphabet are not significantly different.

**Supplementary Table S6.** Larval mortality caused by feeding *Spodoptera litura* on diet supplemented with *AtMYB12*-expressing tobacco leaf extract

| Treatment                            | Per cent mortality<br>(% Growth reduction) |                     |                     |                      |
|--------------------------------------|--------------------------------------------|---------------------|---------------------|----------------------|
|                                      | 3 <sup>rd</sup> day                        | 5 <sup>th</sup> day | 7 <sup>th</sup> day | 10 <sup>th</sup> day |
| <b>Normal diet</b>                   | 0.0<br>-                                   | 0.0<br>-            | 0.0<br>-            | 0.0<br>-             |
| <b>Solvent</b>                       | 0.0<br>(-4.70)                             | 0.0<br>(-6.57)      | 0.0<br>(-16.70)     | 0.0<br>(0.60)        |
| <b>Control extract (0.5mg/ml)</b>    | 0.0<br>(0.0)                               | 0.0<br>(0.54)       | 0.0<br>(19.27)      | 0.0<br>(0.55)        |
| <b>Control extract (1mg/ml)</b>      | 0.0<br>(6.60)                              | 0.0<br>(0.93)       | 0.0<br>(0.07)       | 0.0<br>(0.53)        |
| <b>Transgenic extract (0.5mg/ml)</b> | 0.0<br>(21.88)                             | 0.0<br>(36.16)      | 13.33<br>(64.35)    | 16.66<br>(88.08)     |
| <b>Transgenic extract (1mg/ml)</b>   | 0.0<br>(34.90)                             | 16.66<br>(70.13)    | 43.33<br>(87.50)    | 50.00<br>(95.45)     |
| <b>Rutin (1mg/ml)</b>                | 0.0<br>(66.03)                             | 10.00<br>(67.67)    | 30.0<br>(86.66)     | 46.66<br>(95.32)     |
| <b>Rutin (2mg/ml)</b>                | 0.0<br>(76.41)                             | 33.33<br>(87.94)    | 53.33<br>(95.57)    | 66.66<br>(97.35)     |

Data used in the analysis was utilized from supplementary table 6. Percent Growth Reduction was calculated by comparing weight of treated larvae with the controls (normal diet).

Growth Reduction (%) = 100 - (Weight of Larvae on supplemented diet/weight of larvae in control)\*100

**Supplementary Table S7.** Larval growth reduction caused by feeding *Helicoverpa armigera* on diet supplemented with *AtMYB12*-expressing tobacco leaf extract

| Treatment                     | Average larval weight (mg ± S.E) |                         |                         |                             |
|-------------------------------|----------------------------------|-------------------------|-------------------------|-----------------------------|
|                               | 3 <sup>rd</sup> day              | 5 <sup>th</sup> day     | 7 <sup>th</sup> day     | 10 <sup>th</sup> day        |
| Normal diet                   | 0.85±0.092 <sup>a</sup>          | 5.66±0.17 <sup>a</sup>  | 36.40±1.57 <sup>a</sup> | 211.80 ± 11.14 <sup>a</sup> |
| Solvent                       | 0.72±0.069 <sup>a</sup>          | 5.42±0.21 <sup>a</sup>  | 37.30±1.25 <sup>a</sup> | 206.06 ± 10.33 <sup>b</sup> |
| Control extract (0.5mg/ml)    | 0.44±0.042 <sup>b</sup>          | 2.93±0.30 <sup>b</sup>  | 19.25±1.74 <sup>b</sup> | 116.10 ± 11.21 <sup>c</sup> |
| Control extract (1mg/ml)      | 0.49±0.037 <sup>b</sup>          | 1.01±0.16 <sup>d</sup>  | 14.14±1.00 <sup>c</sup> | 79.64 ± 8.20 <sup>c</sup>   |
| Transgenic extract (0.5mg/ml) | 0.16±0.016 <sup>d</sup>          | 0.55±0.10 <sup>d</sup>  | 4.40±0.65 <sup>d</sup>  | 5.06± 0.83 <sup>d</sup>     |
| Transgenic extract (1mg/ml)   | 0.14±0.016 <sup>d</sup>          | 0.39±0.037 <sup>d</sup> | 1.33±0.21 <sup>d</sup>  | NA                          |
| Rutin (1mg/ml)                | 0.36±0.040 <sup>bc</sup>         | 1.49±0.088 <sup>d</sup> | 1.99±0.14 <sup>d</sup>  | 4.05 ±0.89 <sup>d</sup>     |
| Rutin (2mg/ml)                | 0.28±0.029 <sup>cd</sup>         | 1.00±0.28 <sup>d</sup>  | 0.63±0.04 <sup>d</sup>  | NA                          |

The diet and concentrations were prepared and analysis done as described in table 6. The larvae were released individually to avoid cannibalism.



**Supplementary Table S8.** Larval mortality caused by feeding *Helicoverpa armigera* on diet supplemented with *AtMYB12*-expressing tobacco leaf extract

| Treatment                            | Per cent mortality<br>(% Growth reduction) |                     |                     |                      |
|--------------------------------------|--------------------------------------------|---------------------|---------------------|----------------------|
|                                      | 3 <sup>rd</sup> day                        | 5 <sup>th</sup> day | 7 <sup>th</sup> day | 10 <sup>th</sup> day |
| <b>Normal diet</b>                   | 0.0<br>-                                   | 0.0<br>-            | 0.0<br>-            | 0.0<br>-             |
| <b>Solvent</b>                       | 0.0<br>(15.29)                             | 0.0<br>(4.24)       | 0.0<br>(-2.47)      | 0.0<br>(2.44)        |
| <b>Control extract (0.5mg/ml)</b>    | 0.0<br>(48.23)                             | 0.0<br>(48.23)      | 0.0<br>(47.11)      | 0.0<br>(45.18)       |
| <b>Control extract (1mg/ml)</b>      | 10.00<br>(42.35)                           | 10.00<br>(82.15)    | 10.00<br>(61.15)    | 10.00<br>(62.39)     |
| <b>Transgenic extract (0.5mg/ml)</b> | 33.33<br>(81.17)                           | 40.00<br>(90.28)    | 66.66<br>(87.91)    | 86.66<br>(97.60)     |
| <b>Transgenic extract (1mg/ml)</b>   | 40.00<br>(83.52)                           | 50.00<br>(93.10)    | 80.00<br>(96.88)    | 100<br>NA            |
| <b>Rutin (1mg/ml)</b>                | 30.33<br>(57.64)                           | 33.33<br>(73.67)    | 50.00<br>(94.53)    | 86.66<br>(98.08)     |
| <b>Rutin (2mg/ml)</b>                | 50.00<br>(67.05)                           | 50.00<br>(93.99)    | 83.33<br>(97.25)    | 100<br>NA            |

Data used in the analysis was utilized from supplementary table 8. Other details are same, as in table 7.

**Supplementary Table S9.** The primers used for semi-quantitative analysis of selected genes by RTPCR

| <b>S.No.</b> | <b>Gene name</b> | <b>Forward primer</b>     | <b>Reverse primer</b>    |
|--------------|------------------|---------------------------|--------------------------|
| 1.           | NtUBI            | TCCAGGACAAGGAGGGTAT       | GAGACCTCAGTAGACAAAGC     |
| 2.           | AtMYB12          | AACCAAGGGAATCTCGACTGTCT   | CGTCGTCATGATCTAACGGTTC   |
| 3.           | NTPAL            | GCCAACAGGATAAAAAGAATGC    | CAAGAACATATAAGCACATTG    |
| 4.           | NtCHS            | CCTTTGGGAATTTCTGATTGG     | TCCCACAATATAAGCCCAAGC    |
| 5.           | NtF3H            | AGCTAGAGACTACTCCAGGTG     | AACCGTGATCCAAGTTTTGCCA   |
| 6.           | NtCHI            | GACGGGTAAGCAATACTCAGAGAAG | AACTAGACTCCAATTTCTGGAATG |
| 7.           | NtFLS            | AAGTGATAAATCATGGAATCCAG   | TCTTCACCACCTGCTGCCTCCATC |
| 8.           | NtDFR1           | TCGAGTCCAAGGATCCTGAGAATG  | CAACAACCAGCGGCGGTATGATG  |
| 9.           | NtDFR2           | TGACGAGACCAGCTGGAGCGAC    | CCACATCATAGATGATAGCATG   |
| 10.          | NtCcOR           | CAATCCAGTGTTGGTGCTTG      | CTGCAGGCTCTTCACCGTCTC    |
| 11.          | NtEPSP           | TCTGCATCAGTGGTCACTGCAC    | ACAACCTTCCACGATTGCTC     |
| 12.          | NtA3GRT          | TCAAATCTATGTTGAATTCTGC    | CTGAAGTGACAGAGGTGTGAGG   |
| 13.          | NtRHM            | CATCCTAGAATGCTGATGATG     | CACCAGCAGCATTGAATACATG   |
| 14.          | NtSnakin         | CTTCTGGCAACACTGAAACTTG    | CCAAGAGGAGAGGACACAATTC   |

**Supplementary Table S10.** Oligonucleotide primers used for mutagenising the scaffold of miRNA159a for designing artificial miRNAs for NtFLS

**Candidate 1:**

FLSmiF1

AAGATAGATCTAGATCTGACGATGGAAGGGCCATTGGTATGATGTCAAACATGAGTTGAGCAGGGT  
A

FLSmiR1

AAAATAGAGCTCGTGAAAGAAGGGCCATTGGTATGATGTCAA AAAAGAAGAGTAAAAGCCATTA

**Candidate 2:**

FLSmiF2

AAGATAGATCTAGATCTGACGATGGAAGGGTGAAGATATTGTTTACTTACATGAGTTGAGCAGGGTA

FLSmiR2

AAAATAGAGCTCGTGAAAGAAGGGTGAAGATATTGTTTACTTAAAAGAAGAGTAAAAGCCATTA

**Candidate 3:**

FLSmiF3

AAGATAGATCTAGATCTGACGATGGAAGATACAGACATGTCCCATATAACATGAGTTGAGCAGGGTA

FLSmiR 3

AAAATAGAGCTCGTGAAAGAAGATACAGACATGTCCCATATAAAAAGAAGAGTAAAAGCCATTA
